# Supplementary material
Source: Springer Nature journal article supplement (https://www.springermedizin.de/resource/supplementary/12936_2009_1104_MOESM1_ESM.pdf/9549470)

Village

Forest

Culicinae

Culicinae

Anophelinae

Anophelinae

18

19

20

21

22

23

24

1

2

3

4

5

6

7

8

9

10

Hour

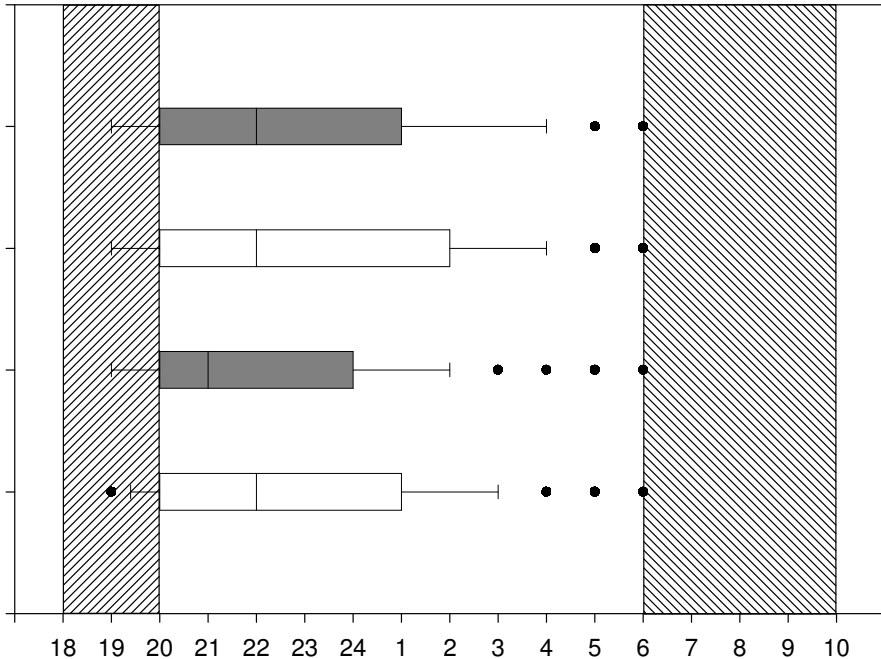

Supplement: MOESM1 [file 9549470]
